# Supplementary material for: Shape memory effect in radiation grafted ion exchange membranes
Source: Royal Society of Chemistry journal article supplement (doi:10.1039/c4ta01467g), 2014-01-01
Supplement: c4ta01467g1.pdf [file c4ta01467g1.pdf]

## Supporting information

# Shape memory effect in radiation grafted ion exchange membranes

Dirk Henkensmeier,<sup>\*a</sup> Lorenz Gubler<sup>b</sup>

<sup>a</sup> Korea Institute of Science and Technology (KIST), Fuel Cell Research Center, Hwarangno 14gil5, Seongbukgu, 136-791 Seoul, South Korea, Tel:+82-2-958-5298;  
Email:henkensmeier@kist.re.kr

<sup>b</sup> Electrochemistry Laboratory, Paul Scherrer Institute, CH-5232 Villigen, Switzerland

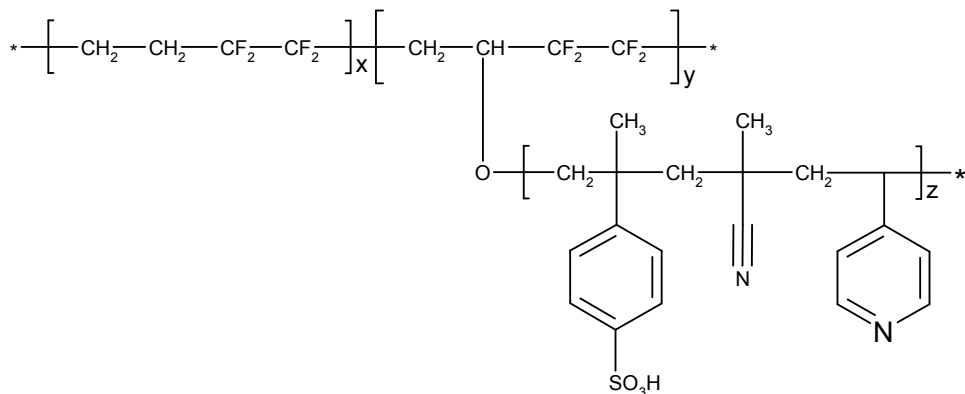

**Figure S1:** Schematic chemical structure ETFE-graft-poly( $\alpha$ -methylstyrenesulfonic acid-co-methacrylonitrile-co-4-vinylpyridine).

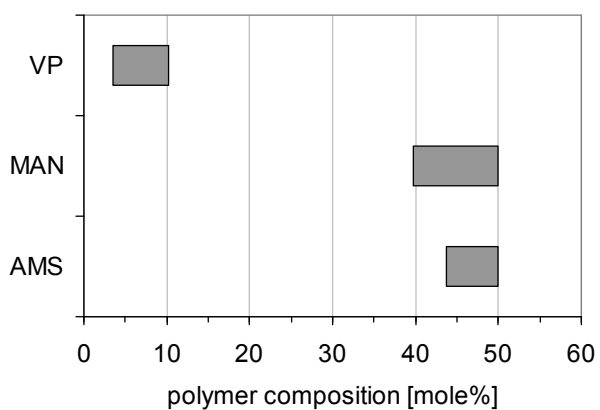

**Figure S2:** Composition of the graft polymer.

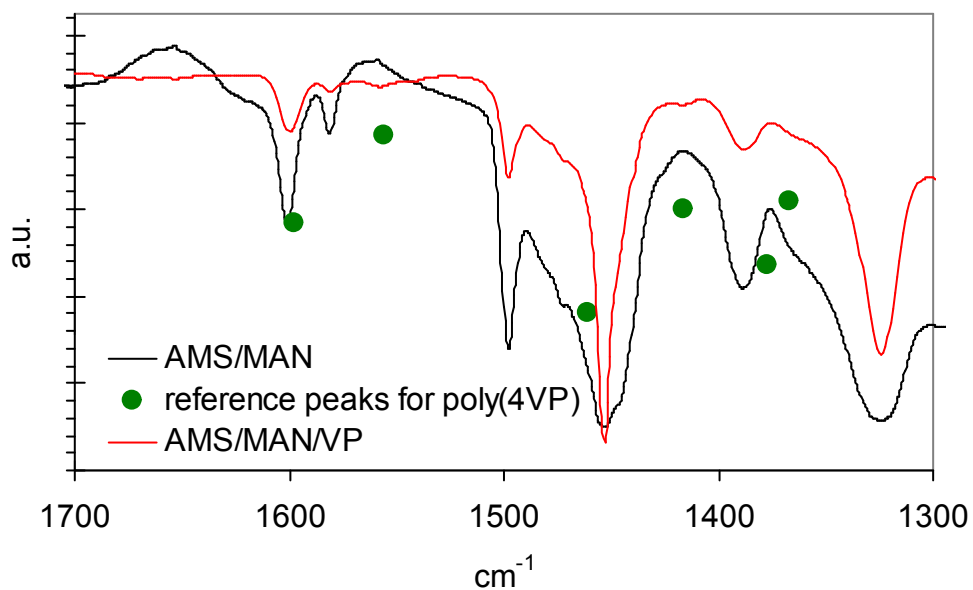

**Figure S3:** FTIR spectra of AMS/MAN and AMS/MAN/VP grafted films before sulfonation, with a degree of grafting of 54 and 55%, respectively; green dots are reference peaks for poly(4-vinylpyridine)[1].

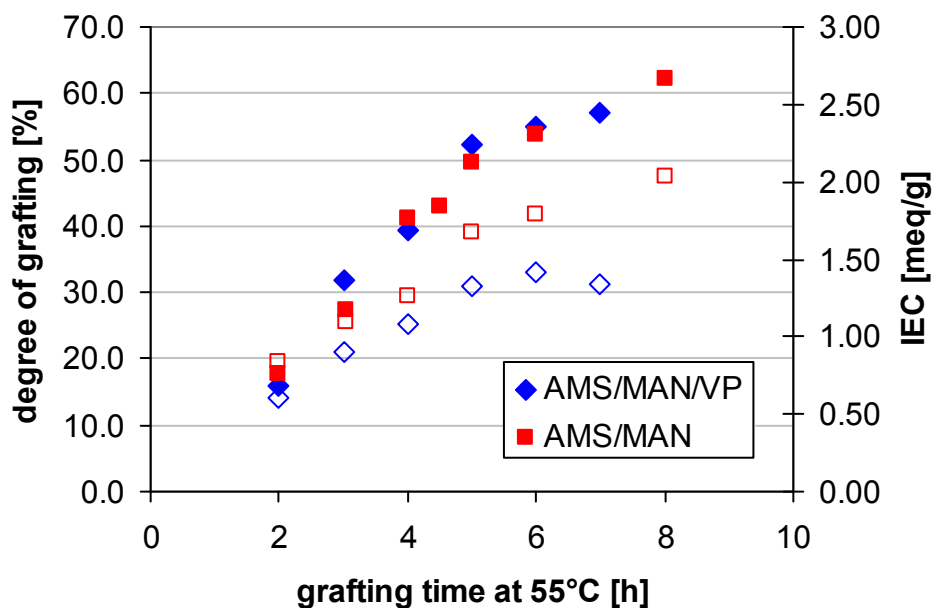

**Figure S4:** Relation between the IEC, achieved degree of grafting and the grafting time for ETFE grafted with AMS/MAN and AMS/MAN/VP.

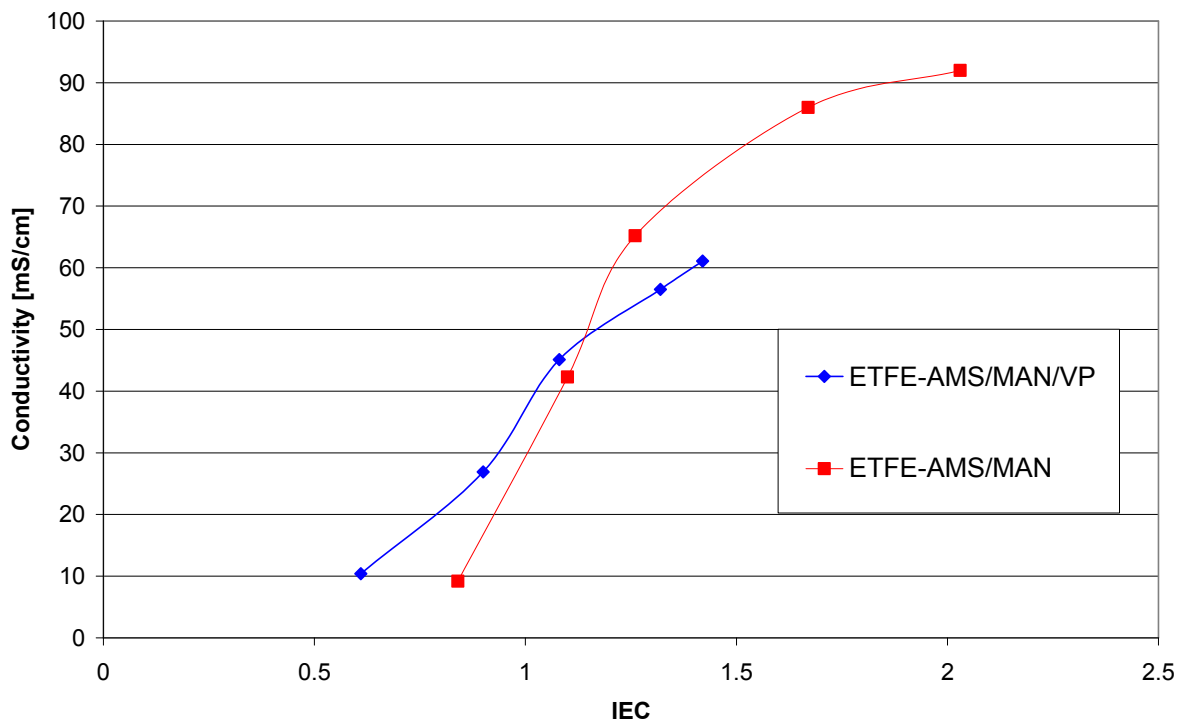

**Figure S5.** Dependence of the through-plane of conductivity of sulfonated membranes on the IEC.

#### Fuel Cell test:

6 membranes based on ETFE-AMS/MAN/DVB (1.67 % (v/v) DVB)[2] were prepared. Half of them were dried freely, the rest was dried under constrained conditions. From these membranes, 6 membrane electrode assemblies (MEAs) were prepared by hotpressing two gas diffusion electrodes (GDE) (loading on each GDE 0.4 mg/cm<sup>2</sup>) and a membrane at 45 kN and 110 °C for 3 min. Then the MEAs were assembled into a short stack. Each cell consisted of one MEA, two 25 μm thick PEN subgaskets and a 0.1 mm thick PTFE gasket. The stack was tested at 80 °C with H<sub>2</sub> and O<sub>2</sub> as fuel and oxydant, flow rates of 1.5 stoich., a pressure of 2.5 bara, and humidifier temperatures of 80 °C. The first three cells were based on freely dried membranes, the last three cells on membranes dried under fixed geometry.

**Table S1:** Fuel Cell Performance of freely dried membranes and membranes dried under constrained conditions before MEA preparation.

| i                  | U_stack | freely dried membranes |        |        |             | membranes dried under fixed geometry |        |        |             |
|--------------------|---------|------------------------|--------|--------|-------------|--------------------------------------|--------|--------|-------------|
|                    |         | cell 1                 | cell 2 | cell 3 | average     | cell 4                               | cell 5 | cell 6 | average     |
| mA/cm <sup>2</sup> | V       | V                      | V      | V      | V           | V                                    | V      | V      | V           |
| 0                  | 6.164   | 1.028                  | 1.031  | 1.022  | 1.027±0.005 | 1.029                                | 1.032  | 1.022  | 1.028±0.005 |
| 178                | 4.606   | 0.809                  | 0.75   | 0.714  | 0.758±0.048 | 0.808                                | 0.799  | 0.726  | 0.778±0.045 |

#### References

1. SDBSWeb: <http://sdbbs.riodb.aist.go.jp> (National Institute of Advanced Industrial Science and Technology, 2013.08.09)

2. D. Henkensmeier, H. Ben youcef, F. Wallasch and L. Gubler, *J. Membr. Sci.*, 2013, **447**, 228.
